# Supplementary material
Source: PubMed Central journal article supplement (PMC3251096)
Supplement: 1107830108_pnas.201107830SI.pdf [file 1107830108_pnas.201107830SI.pdf]

# Supporting Information

Enoksson et al. 10.1073/pnas.1107830108

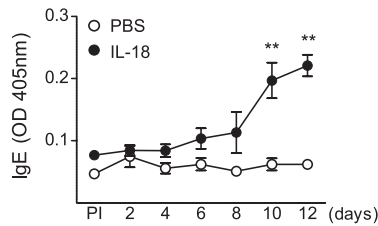

**Fig. S1.** Serum IgE levels increase in IL-18-injected mice but not in PBS-injected controls. Total IgE levels are shown in mice injected with PBS or IL-18 for 12 d. Mean and SEM from six mice per group [preimmune (PI) and indicated time points] are plotted.

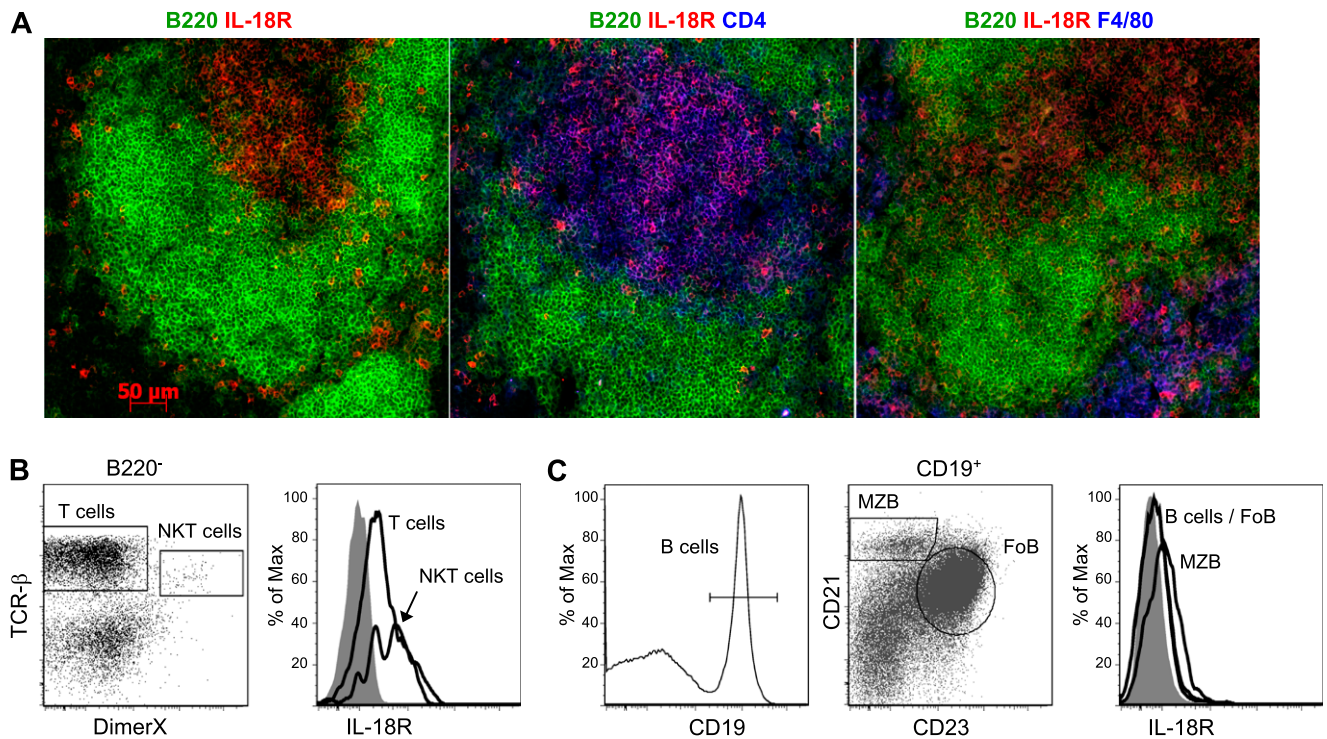

**Fig. S2.** Expression of the IL-18R in the spleen. (A) Immunofluorescence of the spleen for expression of the IL-18R (red/pink) on T cells (CD4<sup>+</sup>) and macrophages (F4/80<sup>+</sup>) in untreated WT mice. (B and C) FACS analysis of IL-18R expression on splenic (B) T cells and invariant NKT cells and (C) mature B-cell subsets. Histograms of IL-18R expression on the indicated cell types (shaded area shows isotype control) and FACS plots show the gating strategy for (B) T cells and invariant NKT cells on B220<sup>-</sup> splenocytes and (C) B cells, FoBs, and MZBs on CD19<sup>+</sup> splenocytes.

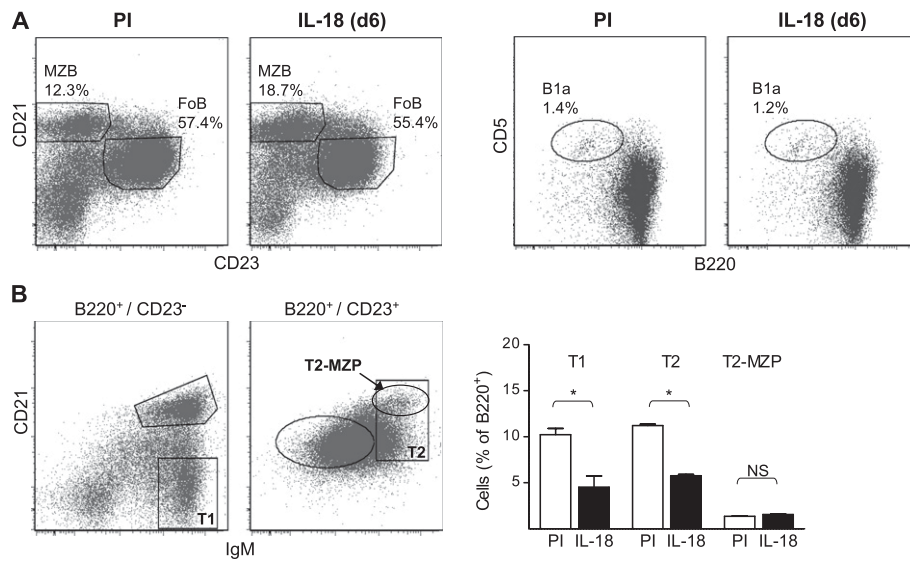

**Fig. 53.** Gating strategy for splenic B-cell populations and quantification of immature B-cell subsets in IL-18-injected mice. (A) Representative FACS plots of the spleen [preimmune (PI) and day 6] showing FoBs and MZBs gated on B220<sup>+</sup> splenocytes as well as the B1a subset gated on TCR-β<sup>-</sup> splenocytes. (B) Representative FACS plots of the spleens of untreated mice showing the gating strategy for the immature B-cell subsets, transitional type 1 (T1) gated on CD23<sup>-</sup> B cells and transitional type 2 (T2) as well as transitional type 2-MZB precursor (T2-MZP) gated on CD23<sup>+</sup> B cells. Quantification of the T1, T2, and T2-MZP subsets in IL-18-injected mice is shown. Mean and SEM from three to five mice per group (PI and day 6) are plotted. \**P* < 0.05 by comparing untreated and IL-18-injected mice with a Mann-Whitney test.

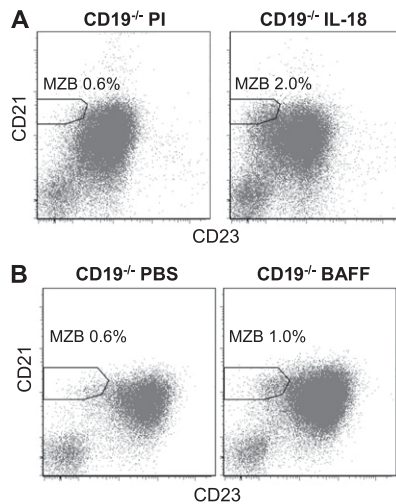

**Fig. 54.** Gating strategy for MZBs in the spleens of CD19<sup>-/-</sup> mice injected with IL-18 or BAFF. (A and B) Representative FACS plots of the MZB gating on B220<sup>+</sup> splenocytes in (A) IL-18-injected mice [preimmune (PI) and day 10] and (B) BAFF- or PBS-injected mice (day 6).
